# Supplementary material for: Enhanced supercapacitor performance of a Cu-Fe2O3/g-C3N4 composite material: synthesis, characterization, and electrochemical analysis
Source: PubMed Central journal article supplement — RSC Adv. 2024 Feb 7;14(7):4917–29. doi: 10.1039/d3ra08428k (PMC10848127; doi:10.1039/d3ra08428k), 2024-02-07
Supplement: RA-014-D3RA08428K-s001.pdf [file RA-014-D3RA08428K-s001.pdf]

## Electronic supplementary information (ESI)

### Enhanced Supercapacitor Performance of Cu-Fe<sub>2</sub>O<sub>3</sub>/g-C<sub>3</sub>N<sub>4</sub> Composite Material: Synthesis, Characterization, and Electrochemical Analysis

Chetan Harak<sup>ac</sup>, Vinayak Kadam<sup>b</sup>, Rakhamaji Gavhane<sup>c</sup>, Sagar Balgude<sup>a</sup>, Anil Rakshe<sup>d</sup>,  
Neha Bramhankar<sup>e</sup>, Santosh Uke<sup>e</sup>, Dilip Satpute<sup>a\*</sup>, Hari Pawar<sup>a\*</sup>, Satish Mardikar<sup>f</sup>

<sup>a</sup>MES Abasaheb Garware College, Pune, Maharashtra, India.

<sup>b</sup>MGV'S Arts, Science and Commerce College, Nashik, Maharashtra, India.

<sup>c</sup>Amrutvahini College of Engineering, Ahmednagar, India.

<sup>d</sup>D. Y. Patil University, Pune, Maharashtra, India.

<sup>e</sup>JDPS College, SGB Amravati University, Amravati, Maharashtra, India.

<sup>f</sup>Smt. R S College, SGB Amravati University, Amravati, Maharashtra, India.

#### Supporting SI 1

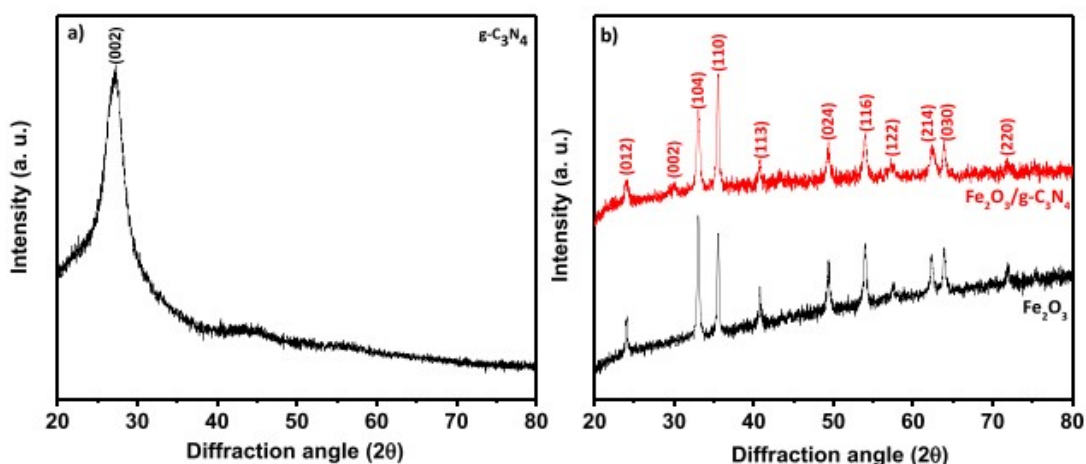

Figure SI 1 XRD diffraction spectra of (a) g-C<sub>3</sub>N<sub>4</sub> and (b) Fe<sub>2</sub>O<sub>3</sub>, and Fe<sub>2</sub>O<sub>3</sub>/g-C<sub>3</sub>N<sub>4</sub> <sup>1</sup>.

#### Supporting SI 2

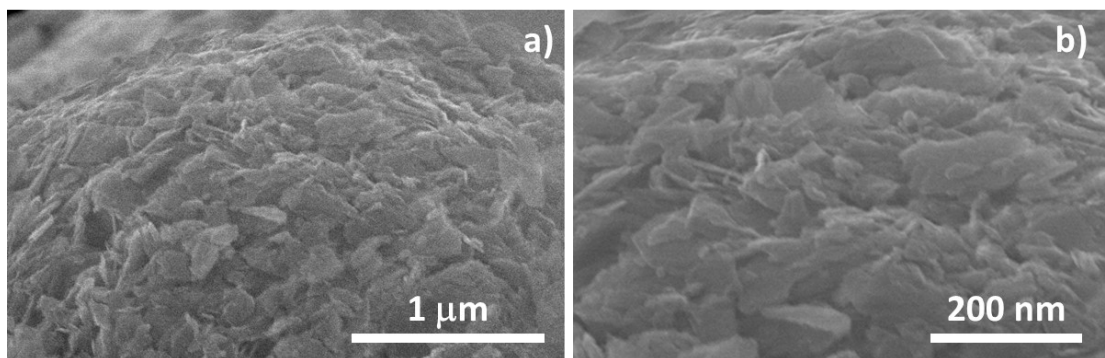

Figure SI 2 FESEM images of pristine  $g\text{-C}_3\text{N}_4$ .

Supporting SI 3

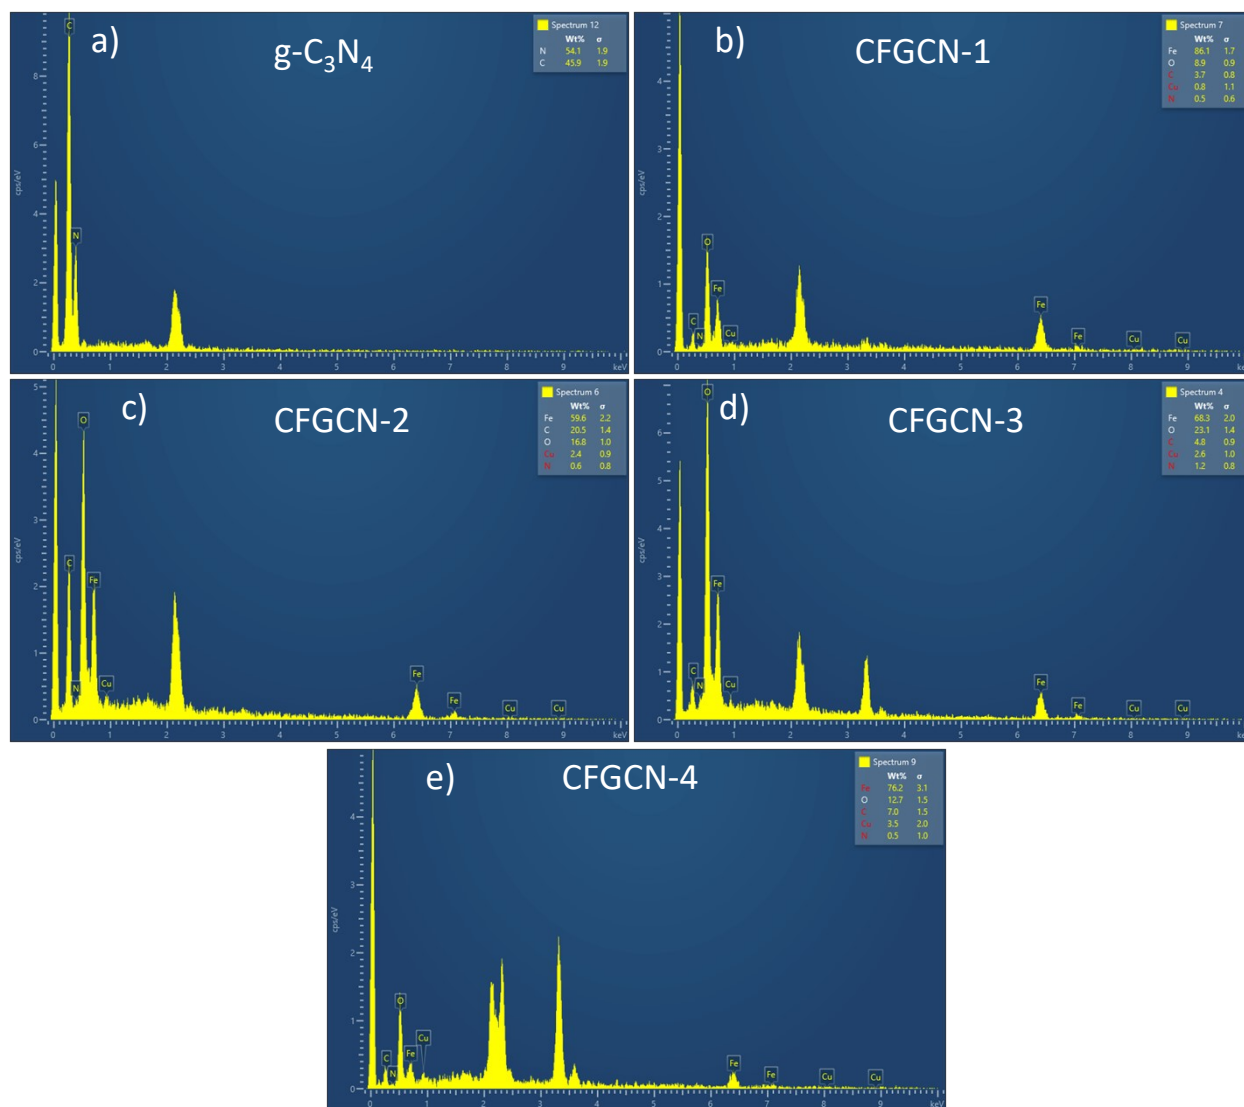

Figure SI 3 EDS of pure  $g\text{-C}_3\text{N}_4$  and Cu doped  $\text{Fe}_2\text{O}_3@g\text{-C}_3\text{N}_4$  nanocomposites.

Supporting SI 4

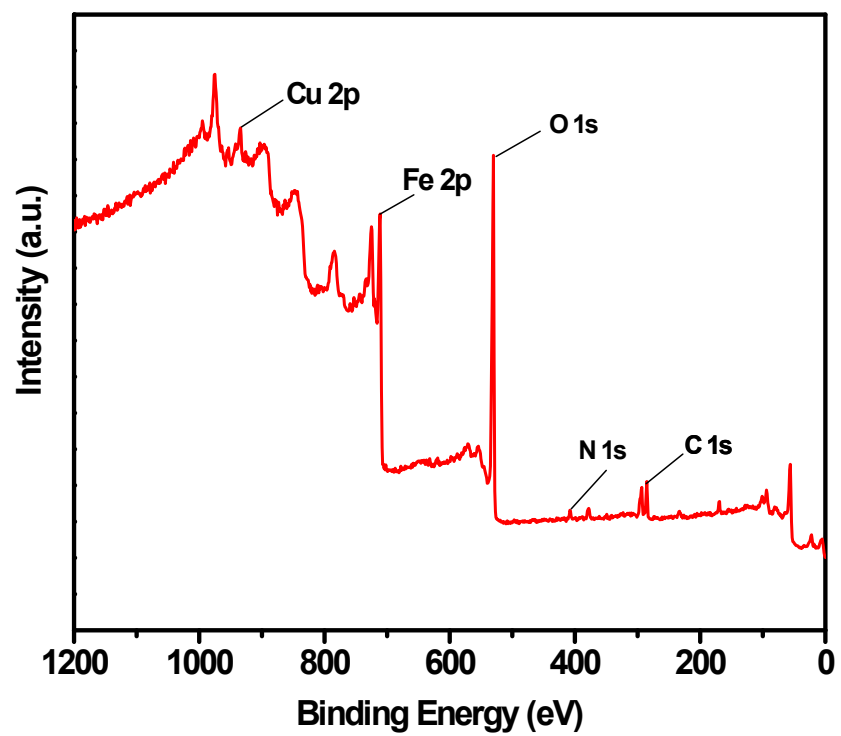

Figure SI 4 XPS survey spectra of Cu doped  $\text{Fe}_2\text{O}_3@g\text{-C}_3\text{N}_4$  nanocomposites <sup>2</sup>.

Table SI 1 Summary of the various preparation conditions of Cu doped Fe<sub>2</sub>O<sub>3</sub>@g-C<sub>3</sub>N<sub>4</sub> nanocomposites.

| Sample  | Amount of Cu (%) | 1M CuSO <sub>4</sub> .5H <sub>2</sub> O (mL) | 1M Fe(NO <sub>3</sub> ) <sub>3</sub> (mL) | g-C <sub>3</sub> N <sub>4</sub> (mg) | 0.2M NaOH (mL)                  |
|---------|------------------|----------------------------------------------|-------------------------------------------|--------------------------------------|---------------------------------|
| CFGCN-1 | 2%               | 1.0                                          | 49.0                                      | 50                                   | Till precipitation of all salts |
| CFGCN-2 | 4%               | 2.0                                          | 48.0                                      | 50                                   |                                 |
| CFGCN-3 | 6%               | 3.0                                          | 47.0                                      | 50                                   |                                 |
| CFGCN-4 | 8%               | 4.0                                          | 46.0                                      | 50                                   |                                 |

### References:

1. Balgude, S.; Godase, S.; Shinde, A.; Harak, C., Succinate assisted synthesis of magnetically separable Fe<sub>2</sub>O<sub>3</sub>/g-C<sub>3</sub>N<sub>4</sub> nano-heterostructure: A stable catalyst for environmental remediation. *Current Research in Green and Sustainable Chemistry* **2021**, *4*, 100210.
2. Harak, C.; Satpute, D.; Kadam, V.; Kolhe, N.; Wade, A.; Balgude, S.; Mardikar, S.; Balgude, S.; Pawar, H., Morphology controlled fabrication of Fe<sub>2</sub>O<sub>3</sub>/GCN composites: a comparative study of hydrothermal and sonochemical synthesis methods for efficient sunlight driven photocatalysis for environmental remediation. *Emergent Materials* **2023**.
